# Supplementary material for: Thermotolerance and plasticity of camel somatic cells exposed to acute and chronic heat stress
Source: PubMed Central journal article supplement — J Adv Res. 2019 Nov 22;22:105–18. doi: 10.1016/j.jare.2019.11.009 (PMC6965514; doi:10.1016/j.jare.2019.11.009), 2019-11-22
Supplement: mmc2.pdf [file mmc2.pdf]

Supplementary Figures 1 and 2

A

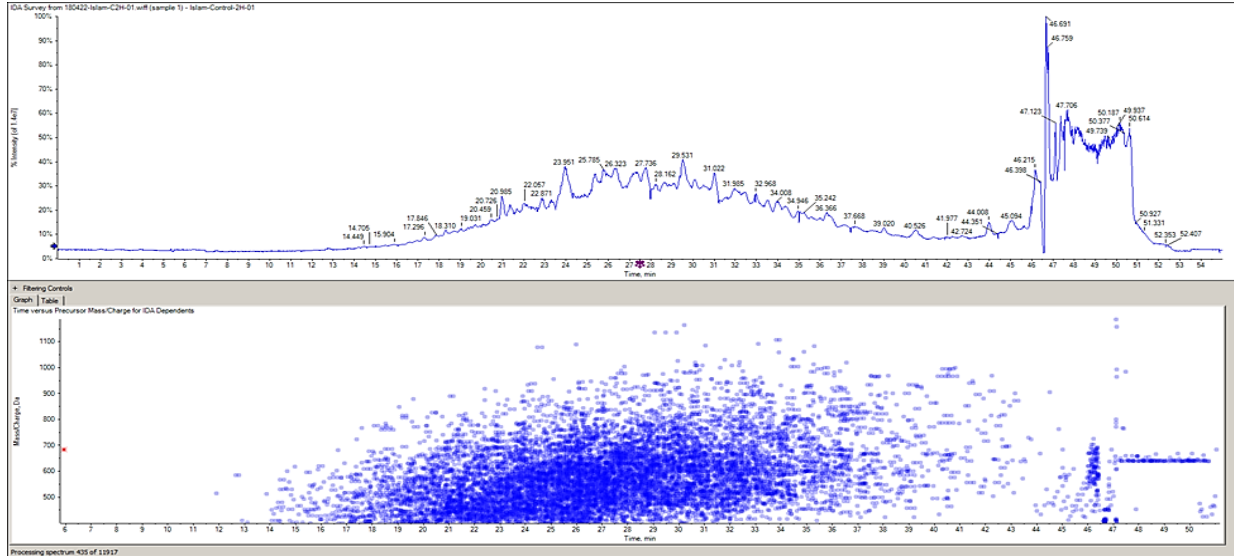

B

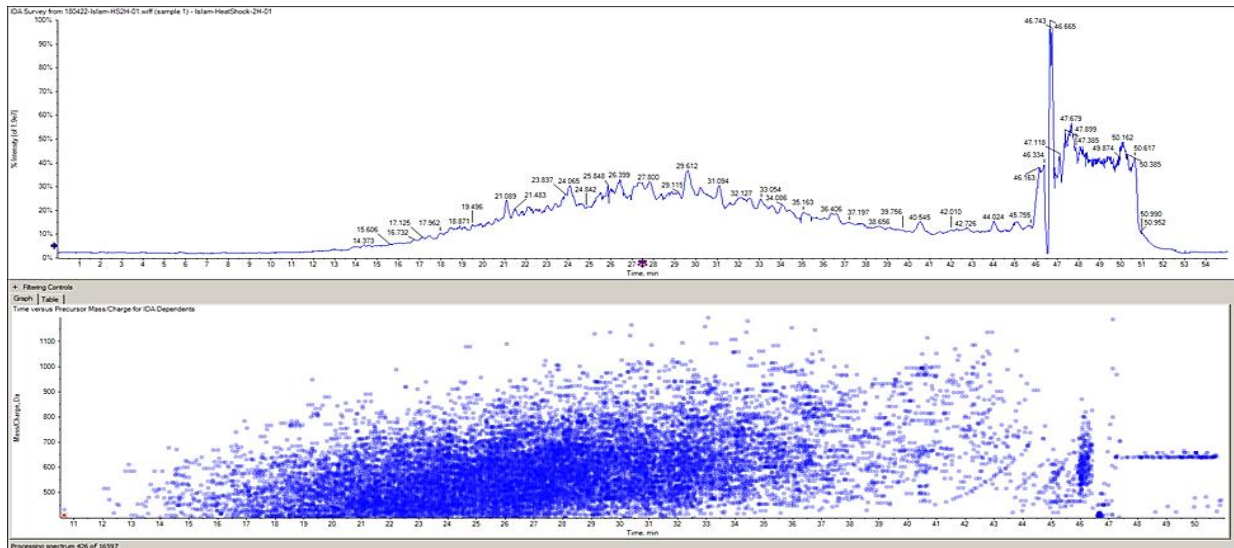

**S. Fig. 1:** Total ion chromatography (TIC) and Information Dependent Acquisition (IDA) of cells exposed to acute heat shock showing peptide elution and peptide fragmentation for control sample (A) and heat shock exposed sample (B).

A

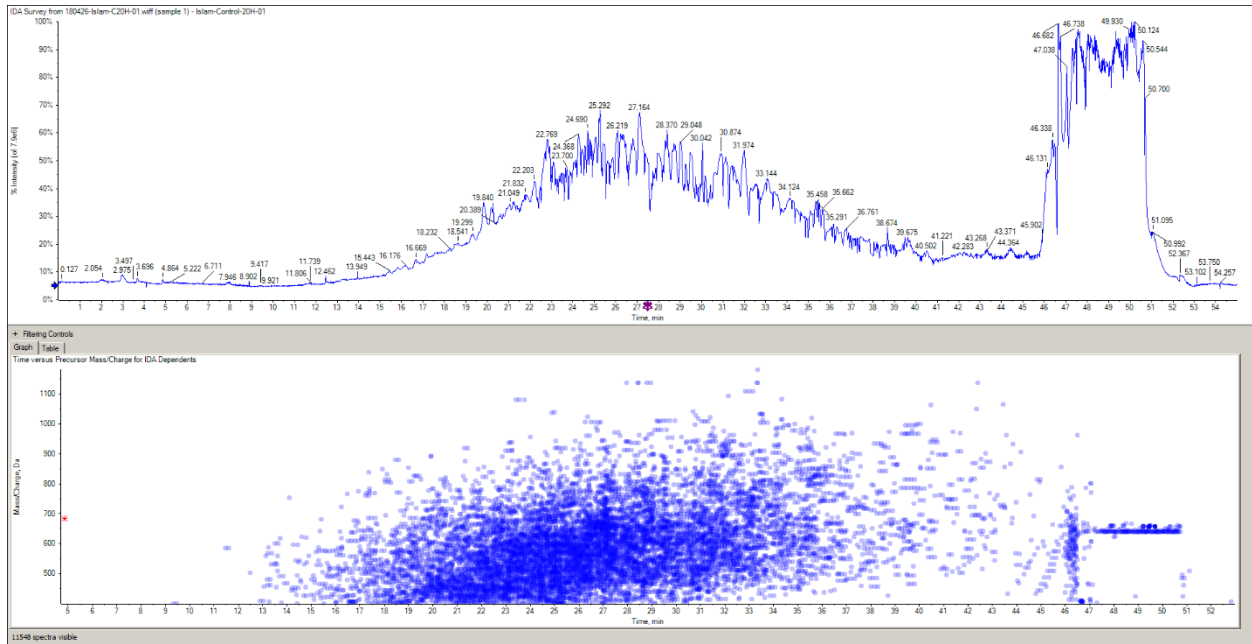

B

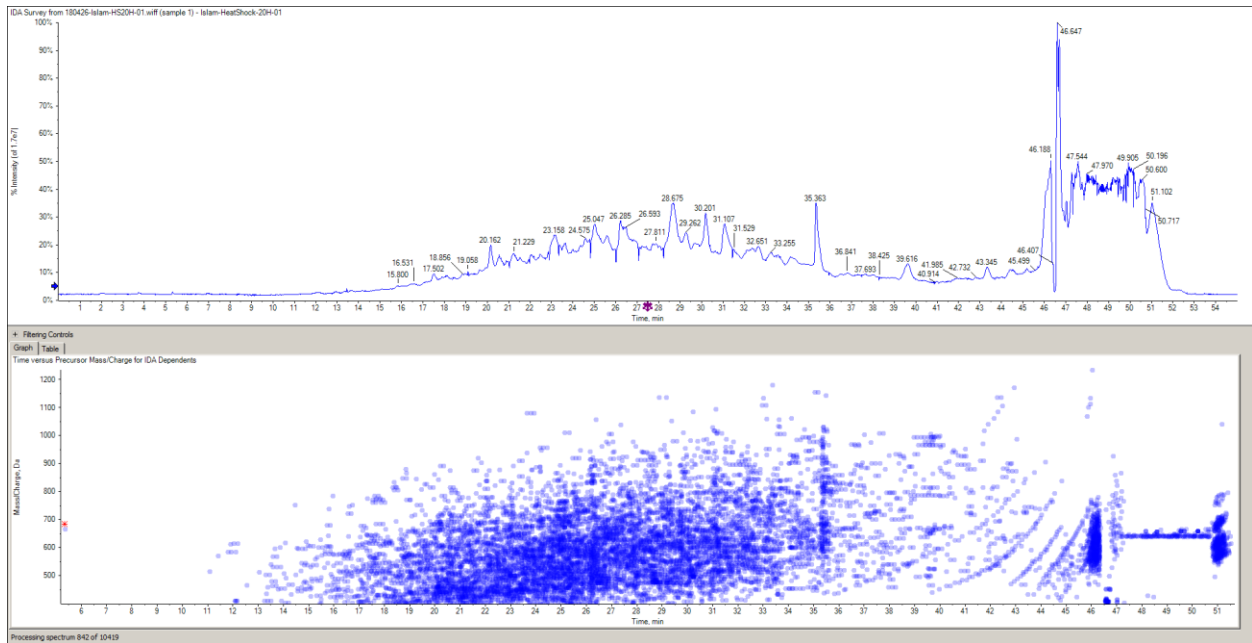

C

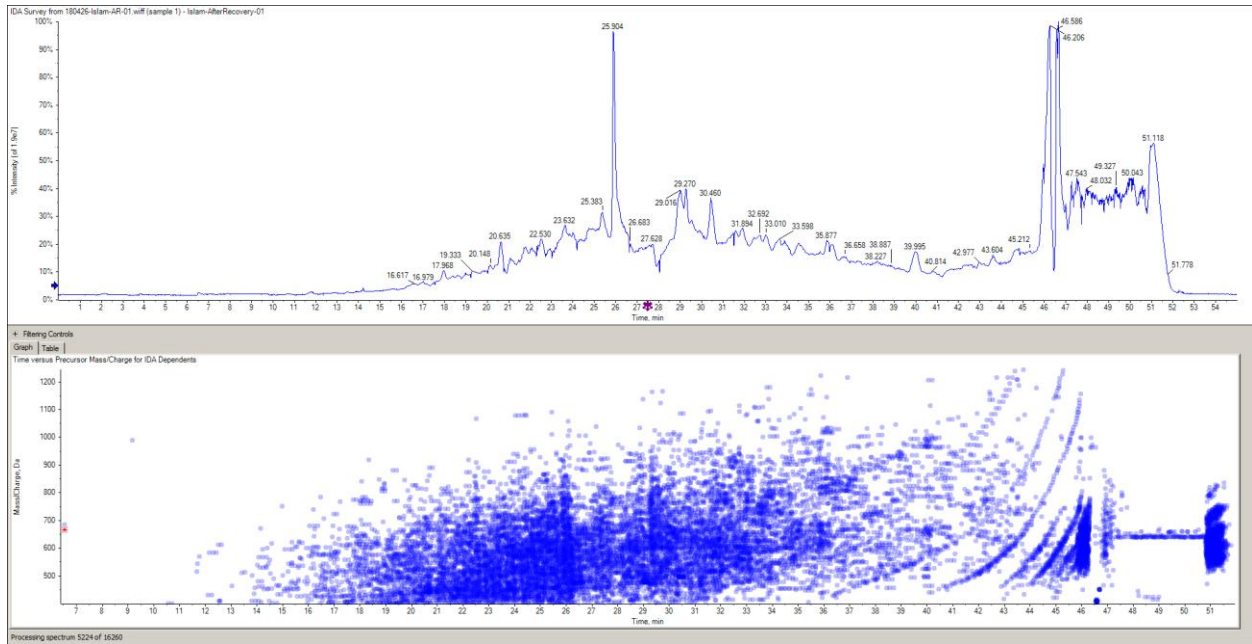

**S. Fig. 2:** Total ion chromatography (TIC) and Information Dependent Acquisition (IDA) of cells exposed to chronic heat stress showing peptide elution and peptide fragmentation for control sample (A) and heat shocked sample (B) and after recovery sample (C).
